# Supplementary material for: Cu doped V2O5 flowers as cathode material for high-performance lithium ion batteries
Source: Royal Society of Chemistry journal article supplement (doi:10.1039/c3nr00548h), 2013-01-01
Supplement: c3nr00548h.pdf [file c3nr00548h.pdf]

## Electronic Supplementary Information

### Cu Doped $V_2O_5$ Flowers as Cathode Material for High-Performance Lithium Ion Batteries

Hong Yu, Xianhong Rui, Huiteng Tan, Jing Chen, Xin Huang, Chen Xu, Weiling Liu, Denis Y. W. Yu, Harry E. Hoster, Qingyu Yan\*

School of Materials Science and Engineering, Nanyang Technological University, 50 Nanyang Avenue, Singapore 639798, Singapore.

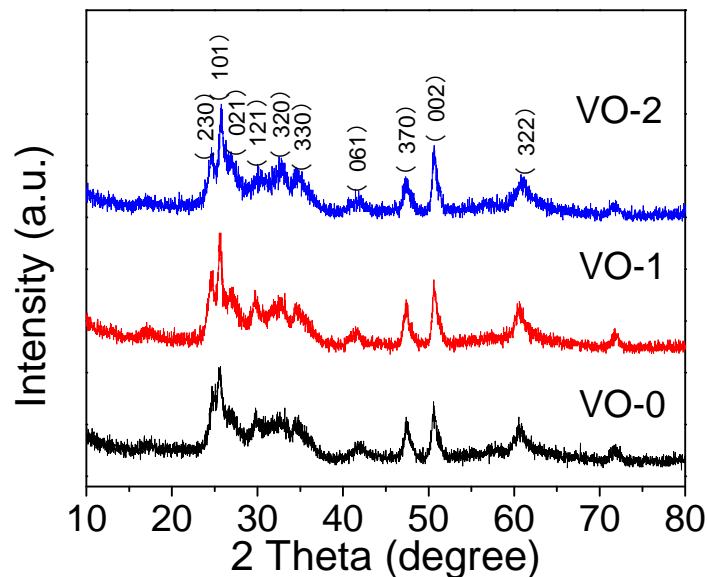

**Fig. S1** The XRD patterns of the as synthesized samples before anneal: VO-0, VO-1 and VO-2.

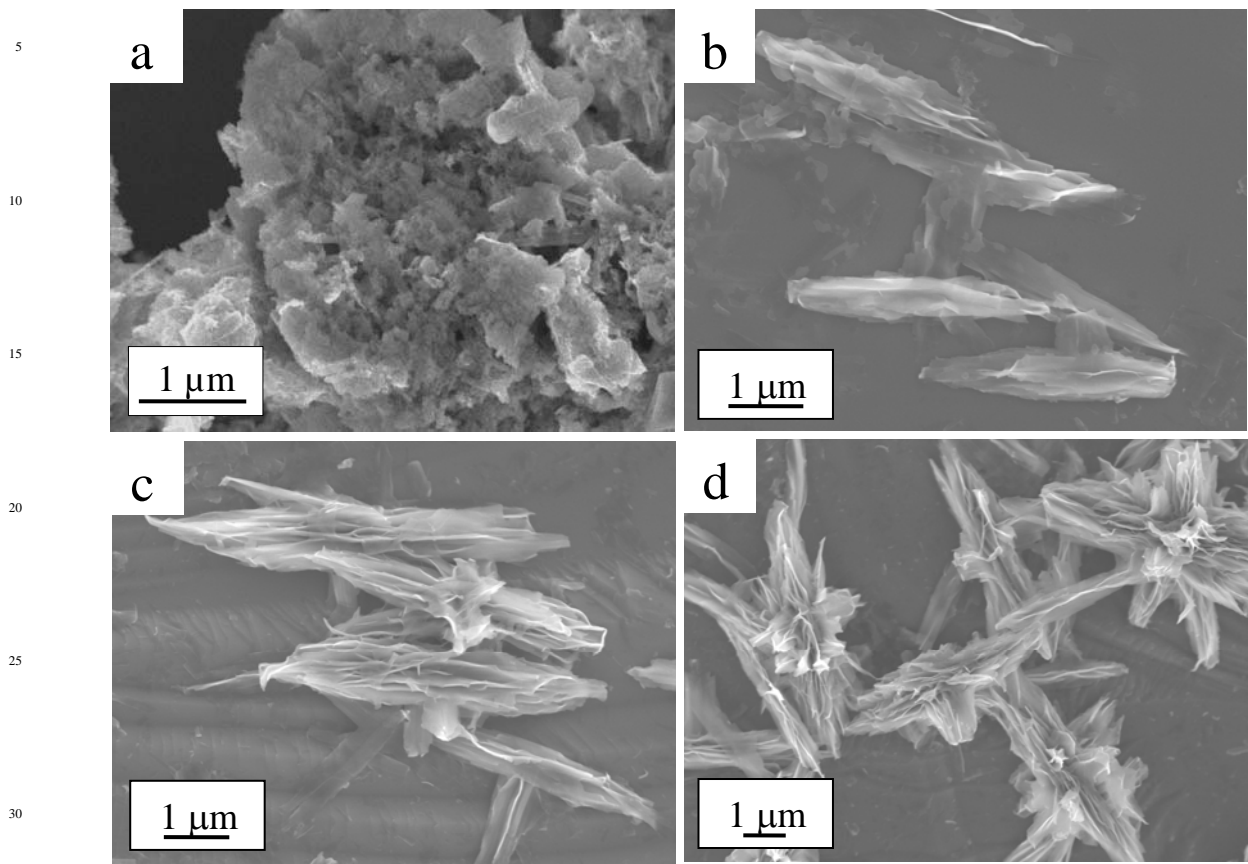

**Fig. S2** FESEM images of the VO-0 sample collected at different hydrothermal time: (a) 30min, (b) 60min, (c) 80min and (d) 100min.

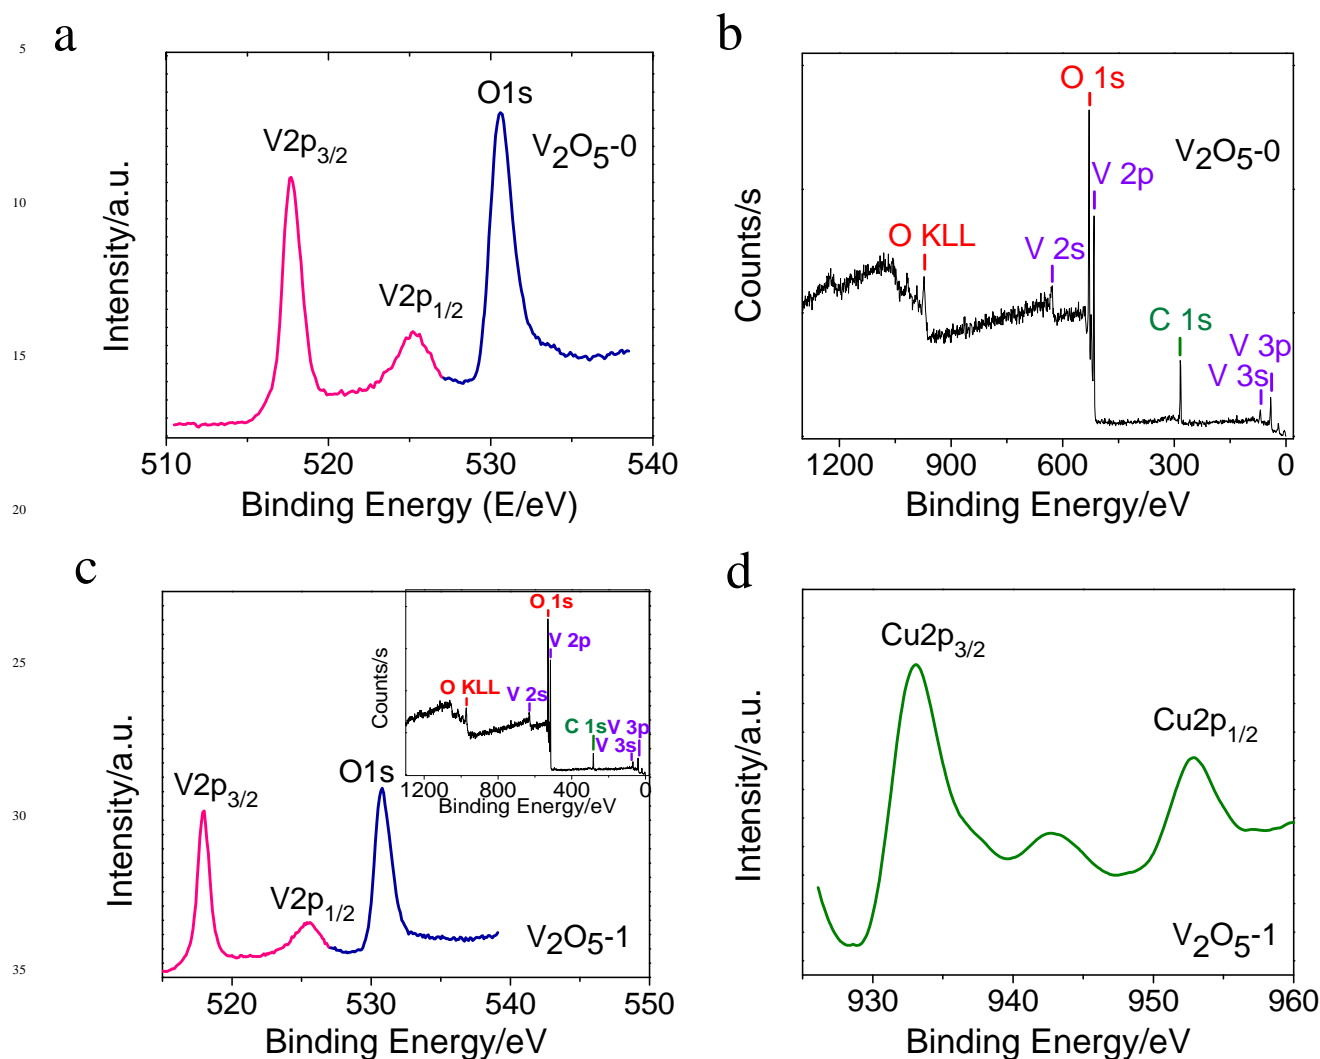

**Fig. S3** (a) The corresponding XPS spectra for the O 1s and V 2p bands, (b) XPS wide-scan survey of sample  $V_2O_5-0$ . (c) The corresponding XPS spectra for the O 1s and V 2p bands, Insert: XPS wide-scan survey of sample  $V_2O_5-1$ . (d) The corresponding XPS spectra for the Cu 2p bands of sample  $V_2O_5-1$ .

5

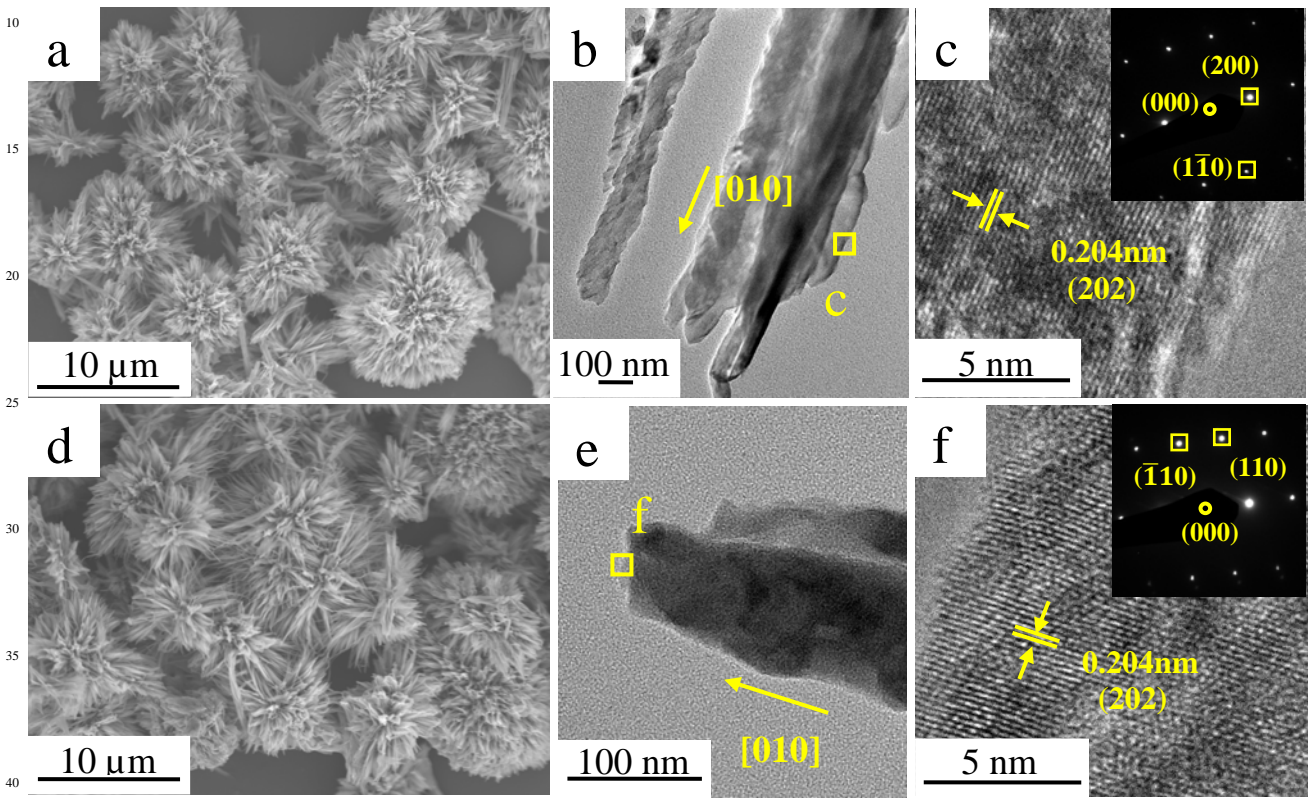

**Fig. S4** Representative FESEM images of the post annealing samples (a)  $\text{V}_2\text{O}_5$ -0 and (d)  $\text{V}_2\text{O}_5$ -1. Representative TEM images of the post annealed samples (b)  $\text{V}_2\text{O}_5$ -0 and (e)  $\text{V}_2\text{O}_5$ -1. Representative HRTEM images and its selected area electron diffraction (SAED) pattern (insert) of post annealed samples (c)  $\text{V}_2\text{O}_5$ -0 and (f)  $\text{V}_2\text{O}_5$ -1 with zone axis [001].

50

55

60

65

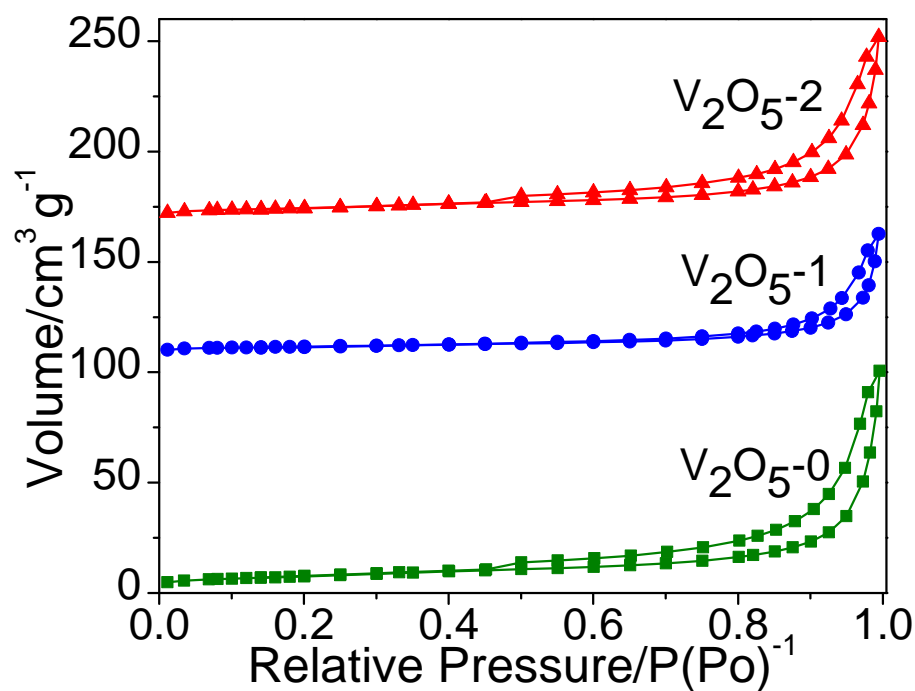

**Fig. S5** Nitrogen adsorption/desorption isotherm and of the post annealing samples:  $V_2O_5-0$ ,  $V_2O_5-1$  and  $V_2O_5-2$ .

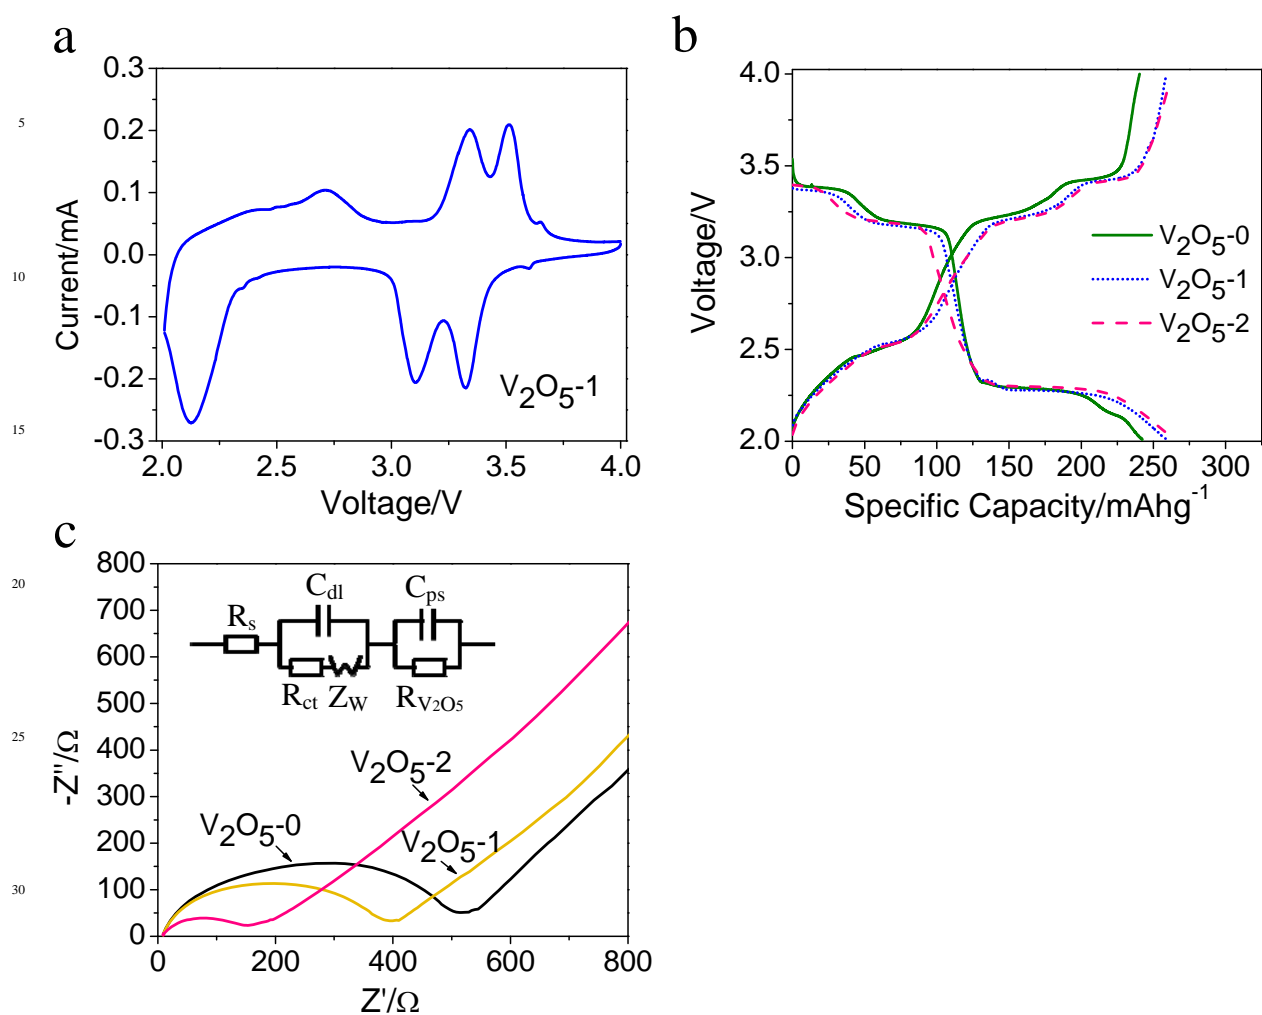

**Fig. S6** (a) CV curve of second cycle at a scan rate of 0.2 mV s<sup>-1</sup> of sample  $V_2O_5-1$ . (b) Galvanostatic charge-discharge voltage profiles of the first cycle at a current density of 58.8 mA g<sup>-1</sup> (0.2 C). (c) Electrochemical impedance spectra of all three electrodes measured at the 4<sup>th</sup> fully discharged state. Inset: The equivalent electrical circuit model for impedance analysis, where  $R_s$  is the electrolyte resistance,  $R_{ct}$  is the charge transfer resistance,  $C_{dl}$  is the double layer capacitance,  $Z_W$  is the Warburg diffusion resistance,  $C_{ps}$  is the pseudocapacitance from  $V_2O_5$  and  $R_{V_2O_5}$  is the internal resistance of the  $V_2O_5$  electrode.

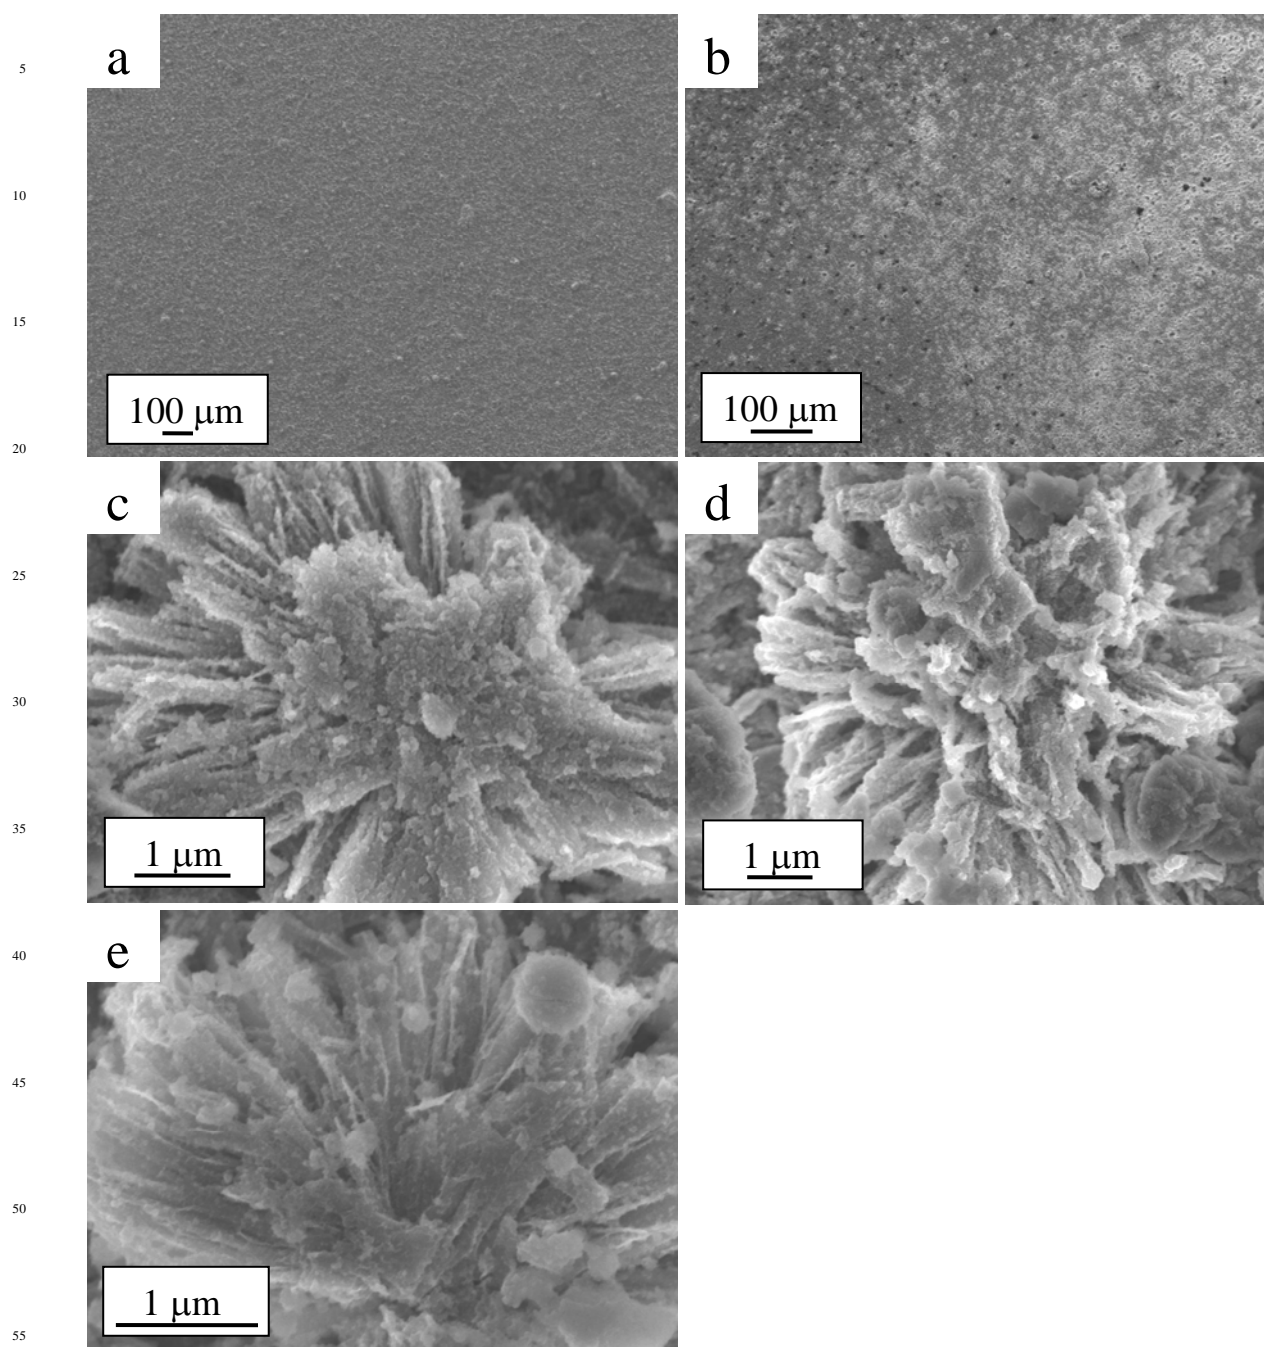

**Fig. S7** Post-mortem FESEM images of electrode films before and after 50 cycles. Low magnification FESEM images of the V<sub>2</sub>O<sub>5</sub>-2 electrode film (a) before and (b) after cycles. Representative FESEM images of the samples after cycling (c) V<sub>2</sub>O<sub>5</sub>-0, (d) V<sub>2</sub>O<sub>5</sub>-1 and (e) V<sub>2</sub>O<sub>5</sub>-2.
